# Supplementary material for: A comprehensive analysis of RHOA mutation positive and negative angioimmunoblastic T-cell lymphomas by targeted deep sequencing, expression profiling and single cell digital image analysis
Source: PubMed Central journal article supplement — Int J Mol Med. 2020 Jul 28;46(4):1466–76. doi: 10.3892/ijmm.2020.4686 (PMC7447311; doi:10.3892/ijmm.2020.4686), 2020-07-28
Supplement: Supplementary_Data.pdf [file Supplementary_Data.pdf]

Figure S1. Monitoring of the retention of transplanted EVs by the live animal imaging system. (A) EVs was labeled with DiI. (B) At the indicated time points, the mice were sacrificed immediately, and the colon tissues were examined using the live animal imaging system. EVs, extracellular vesicles.

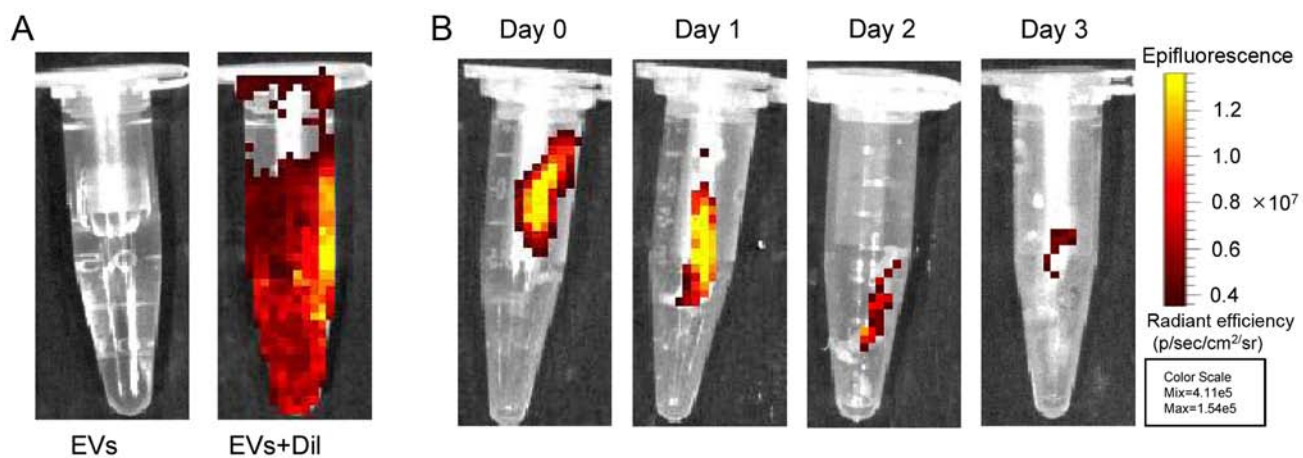

Figure S2. Densitometric analyses of the protein bands in Fig. 3B. Data are expressed as the means  $\pm$  SD of 3 independent experiments. \* $P < 0.05$ , \*\* $P < 0.01$  and \*\*\* $P < 0.001$  vs. sham group. EVs, extracellular vesicles.

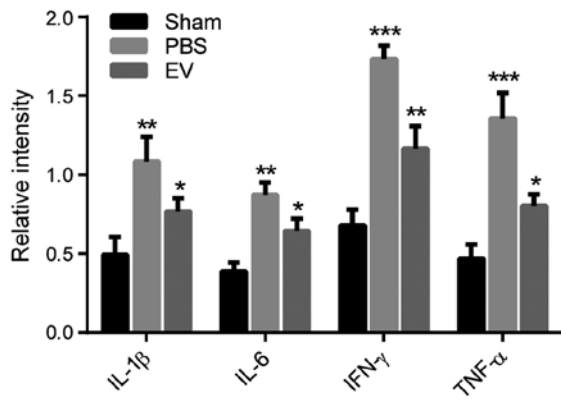

Figure S3. The mean of integrate optical density (IOD) of MPO was measured with image analysis and then statistically analyzed. Data are expressed as the means  $\pm$  SD; (n=8). \*\*P<0.01 vs. sham group; #P<0.05 vs. PBS group. EVs, extracellular vesicles.

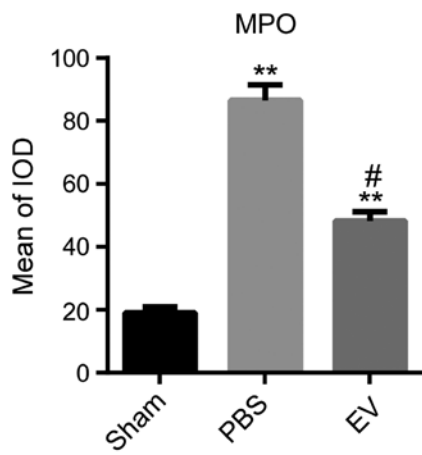

Figure S4. The mean of IOD of caspase-3 was measured with image analysis and then statistically analyzed. Data are expressed as the means  $\pm$  SD; (n=8). \*P<0.05, \*\*P<0.01 vs. sham group; ##P<0.01 vs. PBS group. EVs, extracellular vesicles.

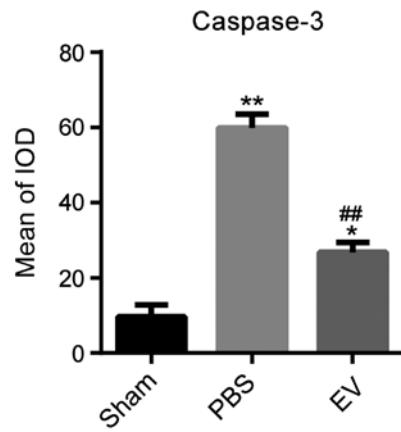

Figure S5. Detection of the expression of EpCAM in the colon tissues. (A) Representative images of immunohistochemical staining of EpCAM in the colon tissues of mice in the sham, PBS and EV groups; (n=8). Scale bar, 100  $\mu$ m. The specific positive coloration of EpCAM is brown. (B) Representative images of immunofluorescence staining of EpCAM in the colon tissues of mice in sham, PBS and EV groups; (n=8) Scale bar, 100  $\mu$ m. EVs, extracellular vesicles.

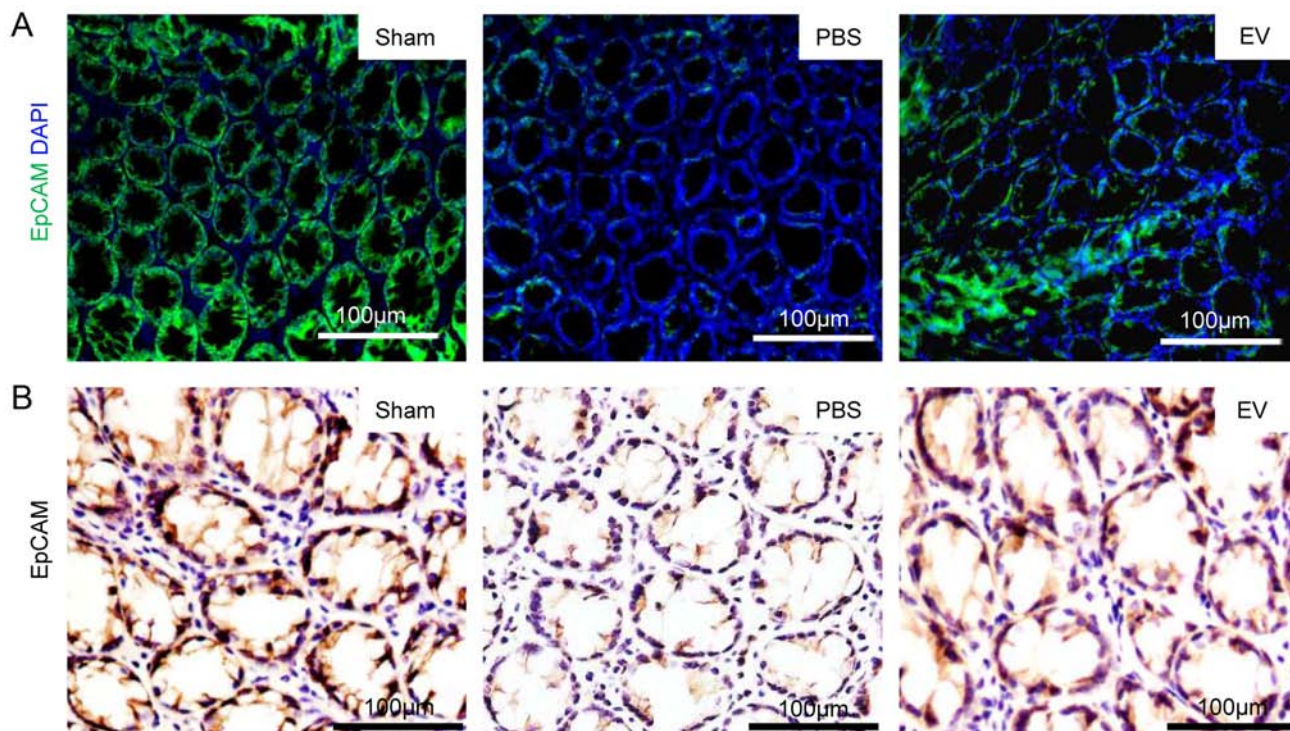

Figure S6. The mean of IOD of Ki67 were measured with image analysis and then statistically analyzed. Data are expressed as the means  $\pm$  SD; (n=8). \*P<0.05 vs. sham group; #P<0.05 vs. PBS group. EVs, extracellular vesicles.

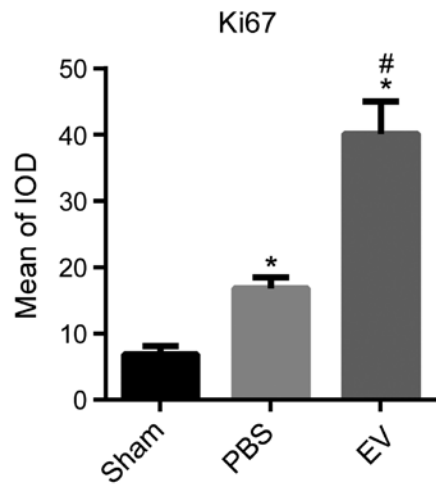

Table SI. Primers used for RT-qPCR.

| Gene           | Primer sequences                                                      |
|----------------|-----------------------------------------------------------------------|
| mIL-10         | Forward: CTTACTGACTGGCATGAGGATCA<br>Reverse: GCAGCTCTAGGAGCATGTGG     |
| mTGF- $\beta$  | Forward: CAACGCAATCTATGACAAAACC<br>Reverse: TGAGCACTGAAGCGAAAGC       |
| mIL-1 $\beta$  | Forward: GAAATGCCACCTTTTGACAGTG<br>Reverse: TGGATGCTCTCATCAGGACAG     |
| mIL-6          | Forward: CTGCAAGAGACTTCCATCCAG<br>Reverse: AGTGGTATAGACAGGTCTGTTGG    |
| mIFN- $\gamma$ | Forward: ACAGCAAGGCGAAAAAGGATG<br>Reverse: TGGTGGACCACTCGGATGA        |
| mTNF- $\alpha$ | Forward: CTGAACTTCGGGGTGATCGG<br>Reverse: GGCTTGTCACTCGAATTTTGAGA     |
| mOccludin      | Forward: TGAAAGTCCACCTCCTTACAGA<br>Reverse: CCGGATAAAAAGAGTACGCTGG    |
| mClaudin       | Forward: TGCCCCAGTGGAAAGATTTACT<br>Reverse: CTTTGCGAAACGCAGGACAT      |
| mZO-1          | Forward: GCTTTAGCGAACAGAAGGAGC<br>Reverse: TTCATTTTTCCGAGACTTCACCA    |
| mMMP-2         | Forward: GGAAGCATCAAATCGGACTG<br>Reverse: CACCCTCTTAAATCTGAAATCACC    |
| mMMP-9         | Forward: CCTGCGTATTTCCATTCACTT<br>Reverse: ATCCTGGTCATAGTTGGCGGT      |
| Caspase-3      | Forward: GGCACAAAGCGACTGGATG<br>Reverse: CTGCCGTGGTACAGAACTGG         |
| Caspase-8      | Forward: ATCTGGCTCGGGGTTACTG<br>Reverse: CTGCGTGGTGGTCATTCTC          |
| Caspase-9      | Forward: GGCTGTCTACGGCACAGATGGA<br>Reverse: CTGGCTCGGGGTTACTGCCAG     |
| $\beta$ -actin | Forward: GTCAGGTCATCACTATCGGCAAT<br>Reverse: AGAGGTCTTTACGGATGTCAACGT |
